# Supplementary material for: Synthesis of dual function Fe3O4@MnO2@HKUST-1 magnetic micromotors for efficient colorimetric detection and degradation of hydroquinone
Source: Royal Society of Chemistry journal article supplement (doi:10.1039/d2nj03909e), 2022-12-01
Supplement: d2nj03909e1.pdf [file d2nj03909e1.pdf]

## Supplementary information file

### Synthesis of Dual Function Fe<sub>3</sub>O<sub>4</sub>@MnO<sub>2</sub> @HKUST-1 Magnetic Micromotors for Efficient Colorimetric Detection and Degradation of Hydroquinone

Hui Luo<sup>a</sup>, Yang Han<sup>a</sup>, Kaiyuan Hu<sup>a</sup>, Jia Li<sup>a\*</sup>, Dickon H.L. Ng<sup>b</sup>, Xiaodi Ma<sup>a</sup>, Kairui Luan<sup>a</sup>,  
Mingkang Yang<sup>a</sup>

<sup>a</sup> School of Material Science and Engineering, University of Jinan, Jinan, 250022, China

<sup>b</sup> School of Science and Engineering, The Chinese University of Hong Kong (Shenzhen),  
Shenzhen, China

**\*Corresponding author:**

E-mail: [mse\\_lij@ujn.edu.cn](mailto:mse_lij@ujn.edu.cn)

Address: School of Material Science and Engineering, University of Jinan, Jinan  
250022, China

Tel/Fax: +86 13953185430

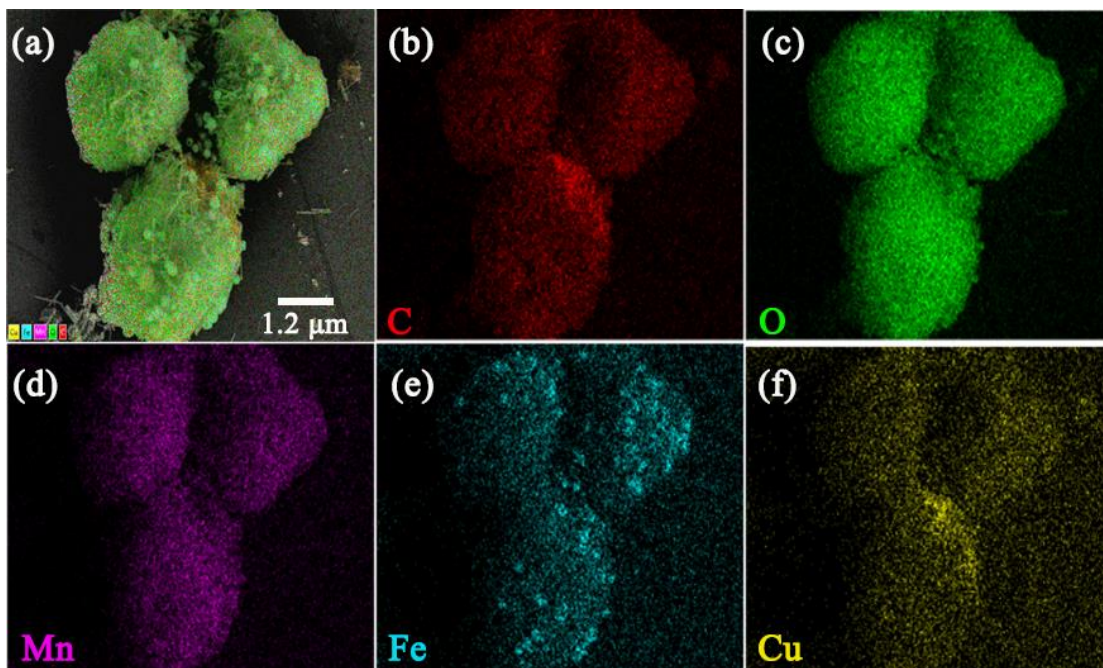

**Fig. S1** EDS mappings of multiple  $\text{Fe}_3\text{O}_4@\text{MnO}_2@\text{HKUST-1}$  particles.

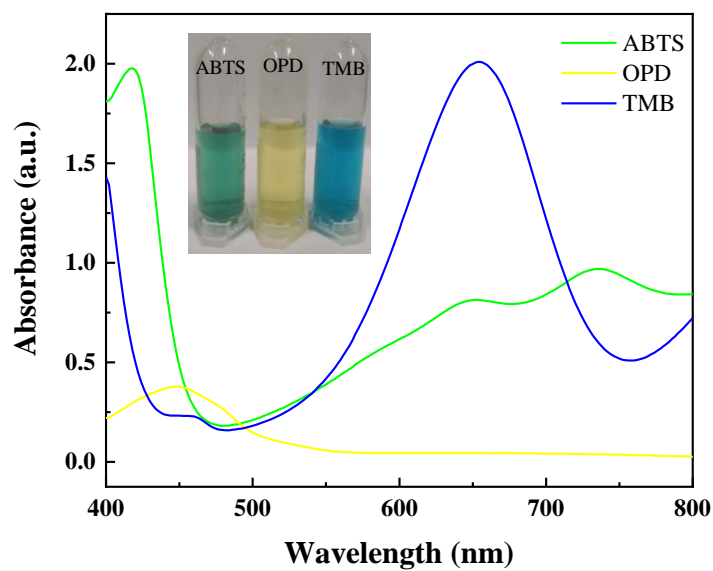

**Fig. S2** UV-vis spectra of the  $\text{Fe}_3\text{O}_4@\text{MnO}_2@\text{HKUST-1}$  ( $50 \mu\text{L } 1 \text{ mg mL}^{-1}$ ) + ABTS ( $100 \mu\text{L } 10 \text{ mM}$ ), OPD ( $100 \mu\text{L } 10 \text{ mM}$ ), or TMB ( $100 \mu\text{L } 10 \text{ mM}$ ) in presence of  $\text{H}_2\text{O}_2$  ( $100 \mu\text{L } 10 \text{ mM}$ ).

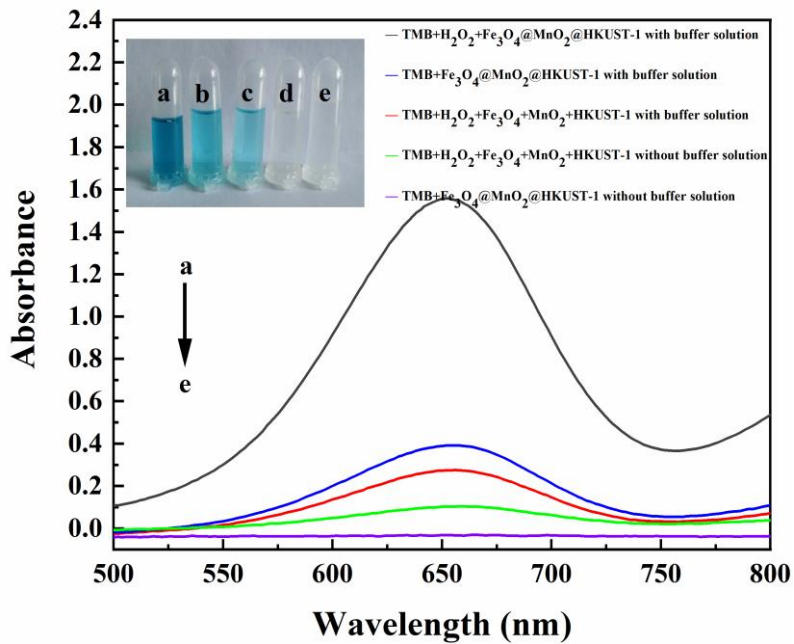

**Fig. S3** The absorption spectrum of TMB+H<sub>2</sub>O<sub>2</sub>+ Fe<sub>3</sub>O<sub>4</sub>@MnO<sub>2</sub>@HKUST-1, TMB + Fe<sub>3</sub>O<sub>4</sub>@MnO<sub>2</sub>@HKUST-1, TMB+H<sub>2</sub>O<sub>2</sub>+Fe<sub>3</sub>O<sub>4</sub>+MnO<sub>2</sub>+HKUST-1 with and without buffer solution.

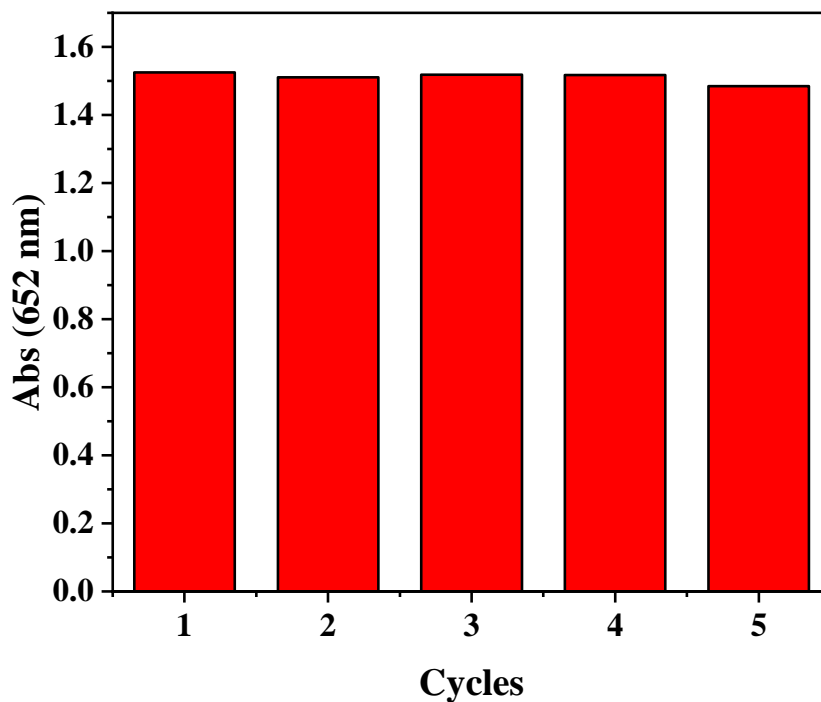

**Fig. S4** Changes in cycle number versus absorbance value of ox-TMB solution in the presence of the same concentration of HQ.

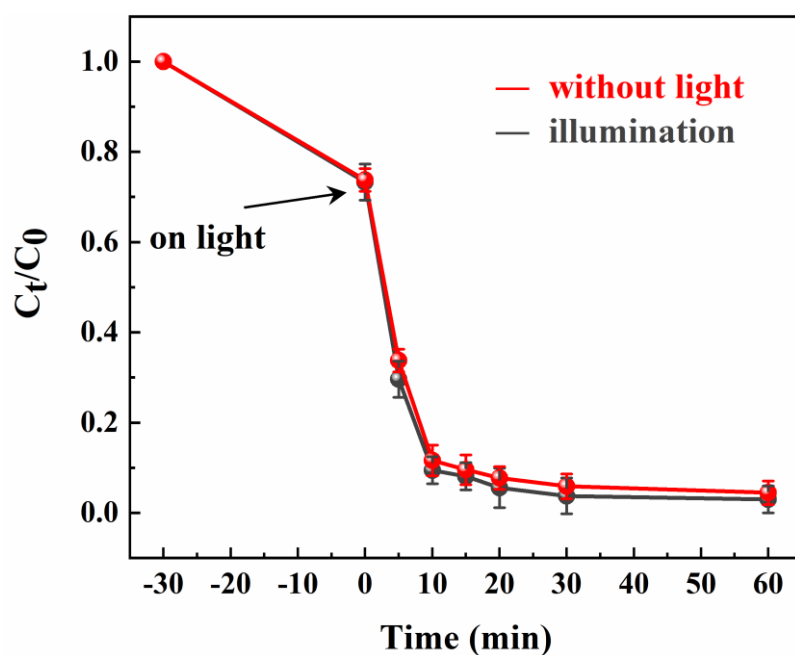

**Fig. S5** The effect of with or without light source on the HQ degradation with the  $\text{Fe}_3\text{O}_4@\text{MnO}_2@\text{HKUST-1}$  micromotor (Xenon lamp, 300W).

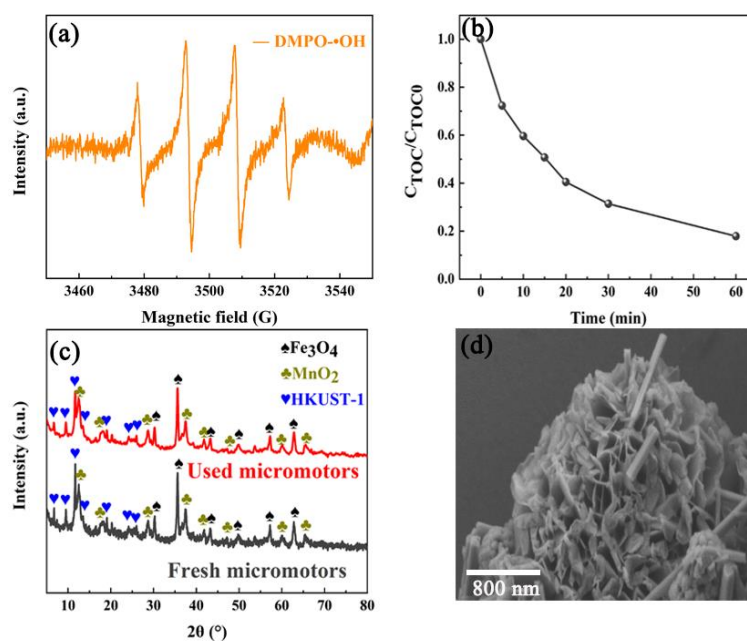

**Fig. S6** EPR spectra of DMPO-•OH in the degradation experiments of HQ (5min, 3 wt%  $\text{H}_2\text{O}_2$ ) (a), the TOC spectrum of HQ degradation (b), XRD of  $\text{Fe}_3\text{O}_4@\text{MnO}_2@\text{HKUST-1}$  micromotors before and after degradation of HQ (c),

FESEM image of  $\text{Fe}_3\text{O}_4@\text{MnO}_2@\text{HKUST-1}$  micromotors after the HQ degradation  
(d).

**Video S1** Motion behavior of  $\text{Fe}_3\text{O}_4@\text{MnO}_2@\text{HKUST-1}$  in 1%  $\text{H}_2\text{O}_2$  aqueous  
containing 0.5% of sodium dodecyl sulfonate.

**Video S2** Motion behavior of  $\text{Fe}_3\text{O}_4@\text{MnO}_2@\text{HKUST-1}$  in 5%  $\text{H}_2\text{O}_2$  aqueous  
containing 0.5% of sodium dodecyl sulfonate under magnetron.

**Table S1** surface area, pore volume, and average pore diameter of different sample.

| sample                                              | Surface<br>Area( $\text{m}^2/\text{g}$ ) | Pore<br>Volume( $\text{m}^3/\text{g}$ ) | average pore<br>diameter (nm) |
|-----------------------------------------------------|------------------------------------------|-----------------------------------------|-------------------------------|
| $\text{MnO}_2$                                      | 123.9                                    | 0.243                                   | 6.079                         |
| HKUST-1                                             | 1592.1                                   | 0.581                                   | 1.631                         |
| $\text{Fe}_3\text{O}_4@\text{MnO}_2@\text{HKUST-1}$ | 408.5                                    | 0.406                                   | 1.564                         |

**Table S2** atomic content ratio of different elements.

| element | atomic percentage (%) |
|---------|-----------------------|
| C       | 41.96                 |
| O       | 34.17                 |
| Mn      | 14.75                 |
| Fe      | 6.74                  |
| Cu      | 2.37                  |
| total   | 100.00                |
